# Supplementary material for: In situ growth of Co3O4 nanoparticles on α-MnO2 nanotubes: a new hybrid for high-performance supercapacitors
Source: Royal Society of Chemistry journal article supplement (doi:10.1039/c4ta00481g), 2014-01-01
Supplement: c4ta00481g1.pdf [file c4ta00481g1.pdf]

## Supplementary Information

### **In-situ growth of $\text{Co}_3\text{O}_4$ nanoparticles on $\alpha\text{-MnO}_2$ nanotubes: A new hybrid for high-performance supercapacitor**

Dongbo Yu,<sup>a,b</sup> Jianfeng Yao,<sup>a</sup> Ling Qiu,<sup>c</sup> Yufei Wang,<sup>c</sup> Xinyi Zhang,<sup>d</sup> Yi Feng,<sup>\*b</sup> and Huanting Wang<sup>\*a</sup>

<sup>a</sup> Department of Chemical Engineering, Monash University, Clayton, Victoria 3800, Australia

<sup>b</sup> School of Materials Science and Engineering, Hefei University of Technology, Hefei, Anhui 230009, People's Republic of China

<sup>c</sup> Department of Materials Engineering, Monash University, Clayton, Victoria 3800, Australia

<sup>d</sup> School of Chemistry, Monash University, Clayton, Victoria 3800, Australia

E-mail addresses: huanting.wang@monash.edu (H. Wang); fyhfut@126.com (Y. Feng)

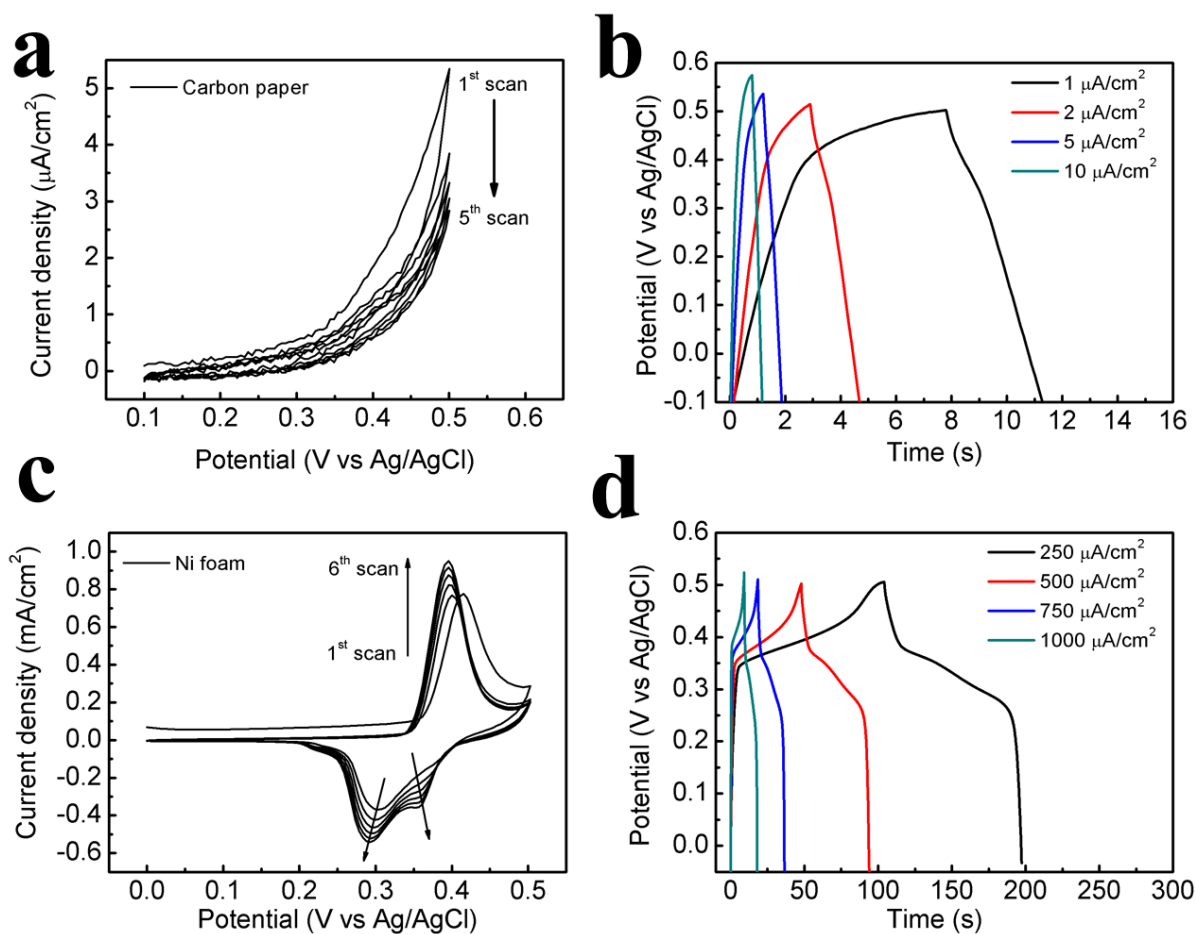

**Fig. S1** Cyclic voltammetric curves (a) and galvanostatic charge-discharge curves (b) of carbon paper; cyclic voltammetric curves (c) and galvanostatic charge-discharge curves (d) of Ni foam. The current density of carbon paper decreased with the repeating scans. In contrary, repeating the cycles led to the increase of current density for Ni foam. Carbon paper hardly contributed to the capacitance, while Ni foam itself was active and gave very big contribution to the capacitance. The calculated capacitance of Ni foam devoted was about 20 F/(g·cm<sup>2</sup>), 43 F/(g·cm<sup>2</sup>), 92 F/(g·cm<sup>2</sup>) and 188 F/(g·cm<sup>2</sup>) as the loading amount of active materials was considered as 1 mg, 0.5 mg, 0.75 mg and 0.25 mg, respectively. According to the results, we could demonstrate that it was reasonable to use carbon paper as current collector rather than Ni foam when the loading amount of active materials was less than 1 mg. In our case, the loading amount was 0.8 mg.

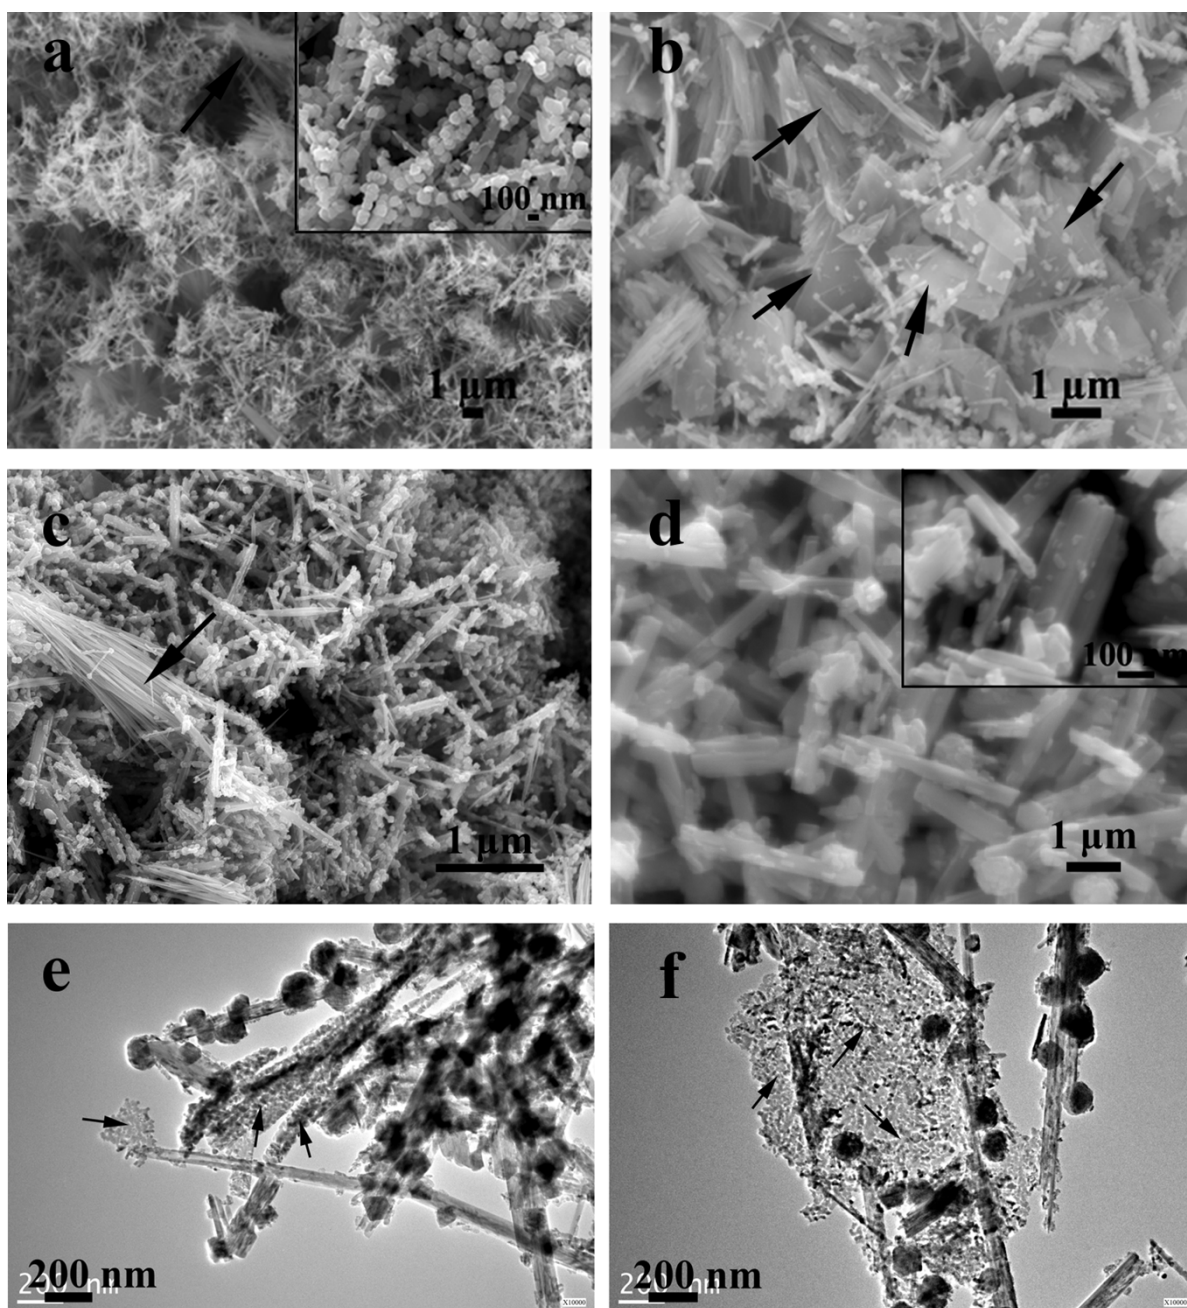

**Fig S2** SEM images of obtained materials without the addition of  $\text{NH}_4\text{F}$  at high concentration (a-c) (the white arrows in (a-c) show the by-product generated in the synthesis) and low concentration (d) of the precursor solution. TEM images (e, f) of resulting products without the addition of  $\text{NH}_4\text{F}$  at high concentration (black arrows show nanowire clusters and nanofilms).

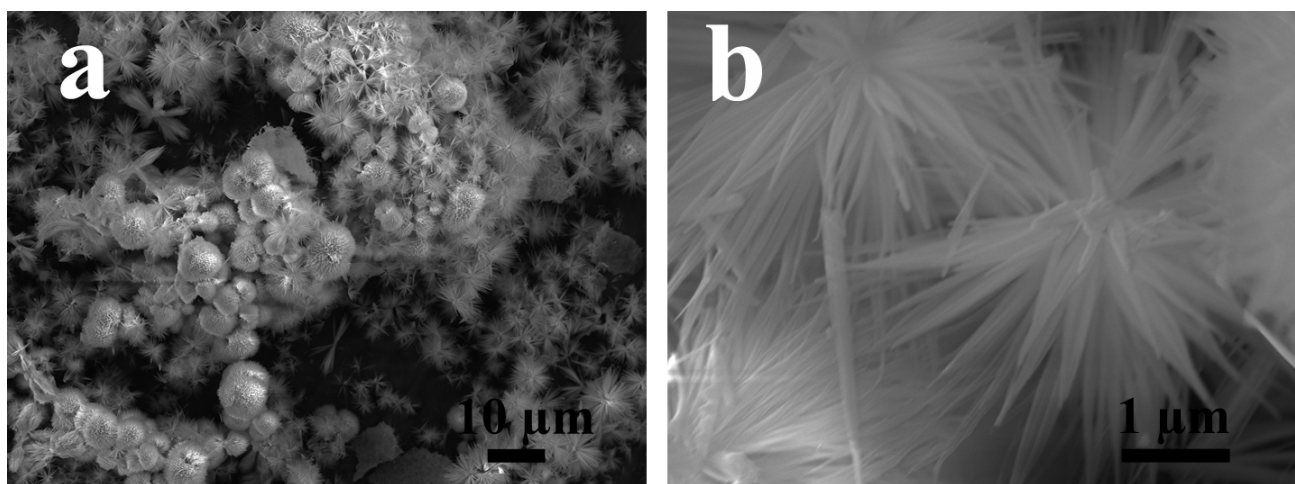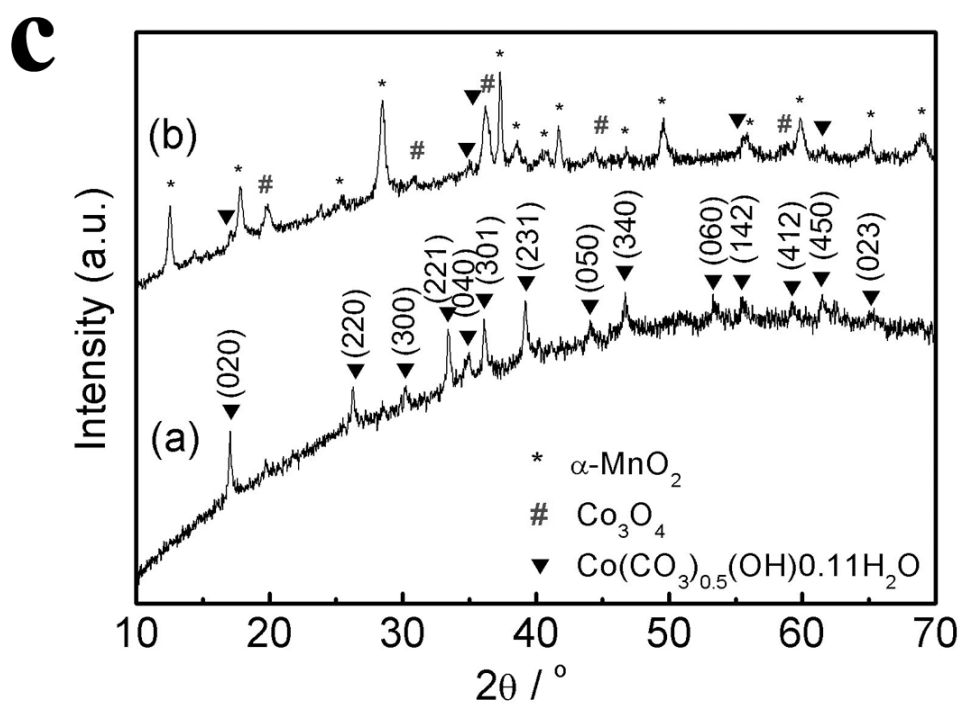

**Fig S3** SEM images of products without the addition of  $\alpha\text{-MnO}_2$  nanotubes and  $\text{NH}_4\text{F}$  (a)(b). XRD of resulting materials without the addition of  $\alpha\text{-MnO}_2$  nanotubes and  $\text{NH}_4\text{F}$  (curve a) and without the addition of  $\text{NH}_4\text{F}$  (curve b). It indicates that the by-product contains  $\text{Co}(\text{CO}_3)_{0.5}(\text{OH})\cdot 0.11\text{H}_2\text{O}$  in the absence of  $\text{NH}_4\text{F}$ .

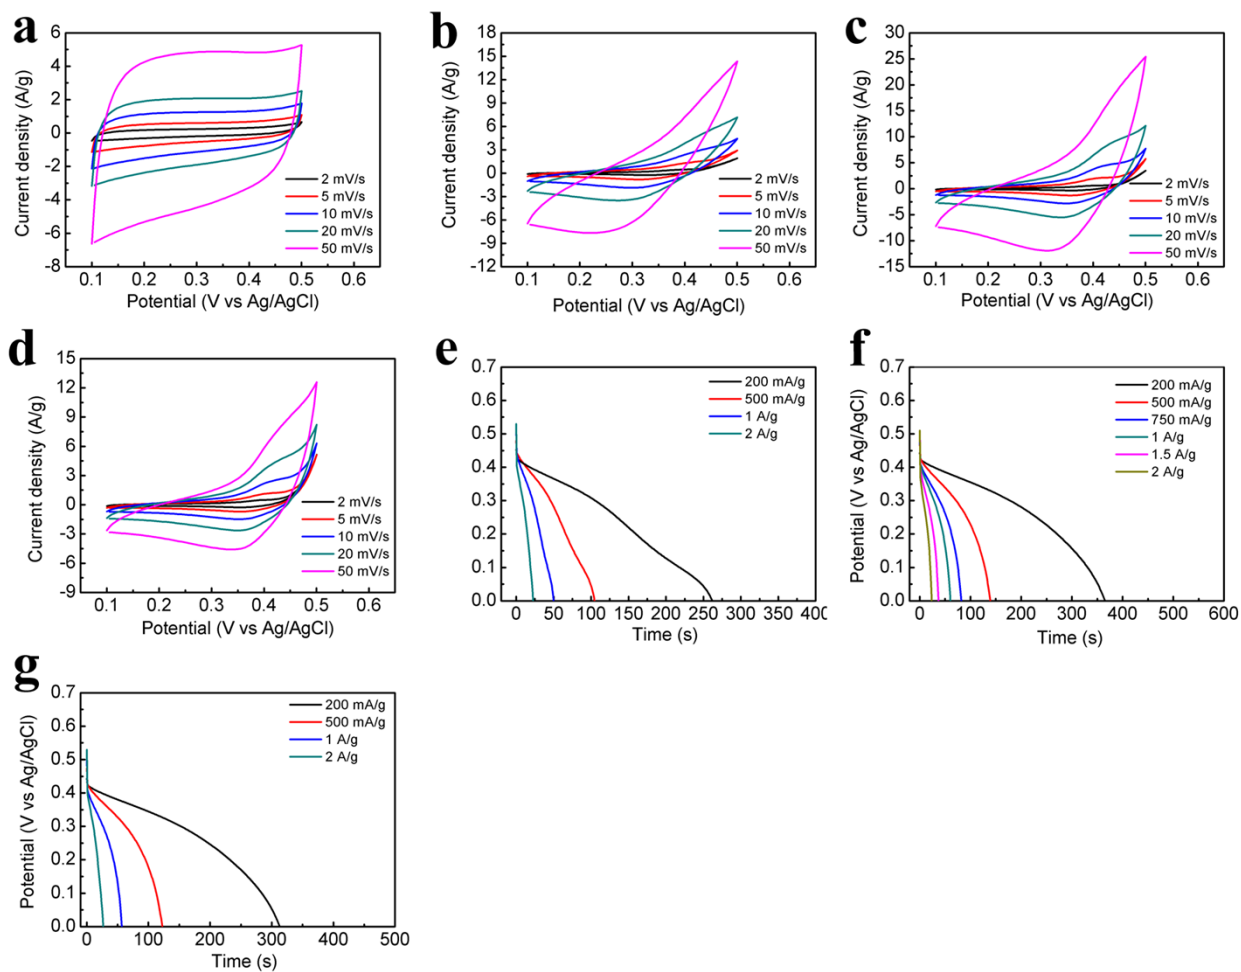

**Fig. S4** Cyclic voltammetric curves of  $\alpha$ -MnO<sub>2</sub> nanotube (a), MnO<sub>2</sub>@Co<sub>3</sub>O<sub>4</sub>-H (b), MnO<sub>2</sub>@Co<sub>3</sub>O<sub>4</sub>-L (c) and MnO<sub>2</sub>+Co<sub>3</sub>O<sub>4</sub> (d) at different scan rates; galvanostatic discharge curves of  $\alpha$ -MnO<sub>2</sub> nanotube (e), MnO<sub>2</sub>@Co<sub>3</sub>O<sub>4</sub>-H (f) and MnO<sub>2</sub>+Co<sub>3</sub>O<sub>4</sub> (g) at different current densities.
